# Supplementary material
Source: PubMed Central journal article supplement (PMC2668570)
Supplement: NIHMS104106-supplement-Supp_Table_1.pdf [file NIHMS104106-supplement-Supp_Table_1.pdf]

**Supplemental Table 1. Race/ethnicity distribution by study**

| <b>Study</b>  | <b>White (%)</b> | <b>Black (%)</b> | <b>Asian (%)</b> | <b>Hawaiian/Pacific Islander (%)</b> | <b>Other* (%)</b> | <b>Total</b> |
|---------------|------------------|------------------|------------------|--------------------------------------|-------------------|--------------|
| CTS           | 95.3             | 1.5              | 2.9              | ---                                  | 0.3               | 1042         |
| EDGE          | 90.3             | 6.3              | 1.1              | ---                                  | 2.3               | 741          |
| FHCRC         | 95.8             | 1.7              | 0.3              | ---                                  | 2.3               | 1566         |
| Hawaii        | 27.4             | ---              | 47.5             | 20.3                                 | 4.8               | 497          |
| MEC           | 22.8             | 19.1             | 24.0             | 13.9                                 | 20.3              | 1833         |
| NHS           | 94.8             | 0.6              | 0.7              | ---                                  | 3.9               | 2291         |
| PECS          | 100.0            | ---              | ---              | ---                                  | ---               | 824          |
| SECS          | ---              | ---              | 100.0            | ---                                  | ---               | 2041         |
| Toronto       | 91.1             | 1.0              | 2.1              | ---                                  | 5.8               | 1117         |
| WISE          | 80.5             | 19.5             | ---              | ---                                  | ---               | 1331         |
| <b>POOLED</b> | <b>66.3</b>      | <b>5.4</b>       | <b>21.1</b>      | <b>2.7</b>                           | <b>4.6</b>        | <b>13283</b> |

\* Including Hispanic, mixed and unknown.
