# Supplementary material
Source: PubMed Central journal article supplement (PMC2668570)
Supplement: NIHMS104106-supplement-Supp_Table_2.pdf [file NIHMS104106-supplement-Supp_Table_2.pdf]

**Table 2. CYP19A1 SNPs and risk of endometrial cancer**

| SNP        | Race/ethnicity     | Cases | Controls          | OR* (95% CI)      |
|------------|--------------------|-------|-------------------|-------------------|
| rs749292   | <b>All women</b>   |       |                   |                   |
|            | <i>N</i>           | 4814  | 7742              |                   |
|            | GG                 | 1279  | 2438              | 1.00              |
|            | AG                 | 2440  | 3806              | 1.19 (1.09, 1.30) |
|            | AA                 | 1095  | 1495              | 1.30 (1.17, 1.45) |
|            | Per allele         |       |                   | 1.14 (1.09, 1.21) |
|            | <b>White women</b> |       |                   |                   |
|            | <i>N</i>           | 3241  | 4934              |                   |
|            | GG                 | 867   | 1517              | 1.00              |
|            | AG                 | 1625  | 2460              | 1.16 (1.04, 1.29) |
|            | AA                 | 749   | 957               | 1.32 (1.16, 1.50) |
|            | Per allele         |       |                   | 1.15 (1.08, 1.22) |
|            | <b>Black women</b> |       |                   |                   |
|            | <i>N</i>           | 142   | 555               |                   |
|            | GG                 | 39    | 168               | 1.00              |
|            | AG                 | 70    | 277               | 0.99 (0.61, 1.60) |
|            | AA                 | 33    | 110               | 1.31 (0.74, 2.31) |
|            | Per allele         |       |                   | 1.14 (0.85, 1.52) |
|            | <b>Asian women</b> |       |                   |                   |
|            | <i>N</i>           | 1208  | 1558              |                   |
|            | GG                 | 300   | 507               | 1.00              |
| AG         | 639                | 746   | 1.31 (1.09, 1.58) |                   |
| AA         | 269                | 305   | 1.28 (1.02, 1.61) |                   |
| Per allele |                    |       | 1.14 (1.02, 1.28) |                   |
| rs727479   | <b>All Women</b>   |       |                   |                   |
|            | <i>N</i>           | 4791  | 7686              |                   |
|            | CC                 | 470   | 861               | 1.00              |
|            | AC                 | 2020  | 3348              | 1.05 (0.93, 1.20) |
|            | AA                 | 2301  | 3477              | 1.15 (1.01, 1.31) |
|            | Per allele         |       |                   | 1.08 (1.02, 1.14) |
|            | <b>White women</b> |       |                   |                   |
|            | <i>N</i>           | 3226  | 4897              |                   |
|            | CC                 | 355   | 589               | 1.00              |
|            | AC                 | 1413  | 2244              | 1.01 (0.87, 1.18) |
|            | AA                 | 1458  | 2064              | 1.13 (0.97, 1.31) |
|            | Per allele         |       |                   | 1.08 (1.01, 1.15) |
|            | <b>Black women</b> |       |                   |                   |
|            | <i>N</i>           | 140   | 540               |                   |
|            | CC                 | 7     | 29                | 1.00              |
|            | AC                 | 43    | 174               | 0.80 (0.31, 2.07) |
|            | AA                 | 90    | 337               | 0.97 (0.40, 2.40) |
|            | Per allele         |       |                   | 1.10 (0.77, 1.56) |
|            | <b>Asian women</b> |       |                   |                   |
|            | <i>N</i>           | 1201  | 1547              |                   |
|            | CC                 | 75    | 130               | 1.00              |
| AC         | 456                | 600   | 1.26 (0.91, 1.74) |                   |
| AA         | 670                | 817   | 1.36 (0.99, 1.86) |                   |
| Per allele |                    |       | 1.12 (0.99, 1.27) |                   |

SNP=single nucleotide polymorphism; OR=odd ratio; CI=confidence interval.

\*The ORs and 95% CI were estimated using unconditional logistic regression adjusting for age, study and race/ethnicity when appropriate.
